# Supplementary material for: Face-to-face stacking of dianionic quinoid rings in crystals of alkali salts of 2,5-dihydroxyquinone in view of π-system polarization
Source: Royal Society of Chemistry journal article supplement (doi:10.1039/c2ce26119g), 2012-10-18
Supplement: c2ce26119g.pdf [file c2ce26119g.pdf]

## Face-to-face stacking of dianionic quinoid rings in crystals of alkali salts of 2,5-dihydroxyquinone in view of $\pi$ –system polarization

### Supporting Information

Krešimir Molčanov<sup>a</sup>, Biserka Kojić-Prodić<sup>a</sup>, and Darko Babić<sup>a,b</sup>

<sup>a</sup>Rudjer Bošković Institute, Bijenička 54, HR-10000 Zagreb, Croatia

<sup>b</sup>Department of Chemistry, Faculty of Science, University of Zagreb, Zagreb, Croatia

**Table S1** Crystallographic, data collection and structure refinement details for **Li<sub>2</sub>DHQ·2H<sub>2</sub>O** (redetermination ).

| Compound                                                      | Li <sub>2</sub> DHQ·2H <sub>2</sub> O                           |
|---------------------------------------------------------------|-----------------------------------------------------------------|
| Empirical formula                                             | C <sub>6</sub> H <sub>4</sub> Li <sub>2</sub> O <sub>5</sub>    |
| Formula wt. / g mol <sup>-1</sup>                             | 187.99                                                          |
| Crystal dimensions / mm                                       | 0.11 x 0.05 x 0.02                                              |
| Space group                                                   | <i>C</i> 2/ <i>m</i>                                            |
| <i>a</i> / Å                                                  | 15.9708(7)                                                      |
| <i>b</i> / Å                                                  | 6.4417(2)                                                       |
| <i>c</i> / Å                                                  | 7.9093(3)                                                       |
| $\alpha$ / °                                                  | 90                                                              |
| $\beta$ / °                                                   | 116.462(5)                                                      |
| $\gamma$ / °                                                  | 90                                                              |
| <i>Z</i>                                                      | 4                                                               |
| <i>V</i> / Å <sup>3</sup>                                     | 728.45(5)                                                       |
| <i>D</i> <sub>calc</sub> / g cm <sup>-3</sup>                 | 1.714                                                           |
| $\mu$ / mm <sup>-1</sup>                                      | 1.305                                                           |
| $\Theta$ range / °                                            | 6.19 – 76.05                                                    |
| <i>T</i> / K                                                  | 293(2)                                                          |
| Radiation wavelength                                          | 1.54179 (CuK $\alpha$ )                                         |
| Diffractometer type                                           | Xcalibur Nova                                                   |
| Range of <i>h</i> , <i>k</i> , <i>l</i>                       | -18 < <i>h</i> < 19;<br>-5 < <i>k</i> < 8;<br>-9 < <i>l</i> < 9 |
| Reflections collected                                         | 1618                                                            |
| Independent reflections                                       | 818                                                             |
| Observed reflections<br>( <i>I</i> ≥ 2 $\sigma$ )             | 758                                                             |
| Absorption correction                                         | Multi-scan                                                      |
| <i>R</i> <sub>int</sub>                                       | 0.0157                                                          |
| <i>R</i> ( <i>F</i> )                                         | 0.0363                                                          |
| <i>R</i> <sub>w</sub> ( <i>F</i> <sup>2</sup> )               | 0.1084                                                          |
| Goodness of fit                                               | 1.081                                                           |
| H atom treatment                                              | Free                                                            |
| No. of parameters                                             | 96                                                              |
| No. of restraints                                             | 3                                                               |
| $\Delta\rho_{\max}$ , $\Delta\rho_{\min}$ (eÅ <sup>-3</sup> ) | 0.299; -0.269                                                   |

**Table S2** Primitive unit cell parameters of the experimental and calculated structures.

|                                                        | a / Å | b / Å | c / Å | $\alpha / ^\circ$ | $\beta / ^\circ$ | $\gamma / ^\circ$ | rel.<br>energy <sup>2</sup><br>/kJ mol <sup>-1</sup> |
|--------------------------------------------------------|-------|-------|-------|-------------------|------------------|-------------------|------------------------------------------------------|
| Na <sub>2</sub> DHQ–A                                  | 3.73  | 9.93  | 7.71  | 90.0              | 100.7            | 90.0              | 0.0                                                  |
| Na <sub>2</sub> DHQ–B <sup>1</sup>                     | 6.08  | 8.12  | 7.54  | 122.4             | 113.3            | 90.5              | 107.95                                               |
| Na <sub>2</sub> DHQ–C                                  | 3.73  | 9.93  | 7.72  | 90.0              | 100.7            | 90.0              | 0.0                                                  |
| K <sub>2</sub> DHQ–X-ray                               | 3.93  | 11.24 | 8.33  | 90.0              | 102.8            | 90.0              | –                                                    |
| K <sub>2</sub> DHQ–A                                   | 4.00  | 10.59 | 8.38  | 90.1              | 103.5            | 90.0              | 0.0                                                  |
| K <sub>2</sub> DHQ–B <sup>1</sup>                      | 6.80  | 8.14  | 7.95  | 120.8             | 115.3            | 90.0              | 27.31                                                |
| K <sub>2</sub> DHQ–C                                   | 3.56  | 11.26 | 8.11  | 90.0              | 90.1             | 81.0              | 27.25                                                |
| Rb <sub>2</sub> DHQ– X-ray <sup>1</sup>                | 7.23  | 8.17  | 8.28  | 120.0             | 115.9            | 90.0              | –                                                    |
| Rb <sub>2</sub> DHQ–A                                  | 4.42  | 11.07 | 8.37  | 90.0              | 100.8            | 90.1              | 10.62                                                |
| Rb <sub>2</sub> DHQ–B <sup>1</sup>                     | 7.50  | 8.12  | 8.19  | 119.7             | 117.2            | 90.0              | 0.0                                                  |
| Rb <sub>2</sub> DHQ–C                                  | 3.82  | 11.99 | 8.11  | 89.8              | 89.0             | 90.2              | 10.12                                                |
| (NH <sub>4</sub> ) <sub>2</sub> DHQ–X-ray <sup>1</sup> | 7.03  | 8.24  | 8.24  | 60.1              | 64.8             | 64.8              | –                                                    |
| (NH <sub>4</sub> ) <sub>2</sub> DHQ–B <sup>1</sup>     | 6.94  | 8.23  | 8.23  | 61.7              | 65.0             | 65.1              | –                                                    |
| Cs <sub>2</sub> DHQ–X-ray <sup>1</sup>                 | 3.89  | 7.64  | 7.64  | 114.6             | 90.0             | 90.0              | –                                                    |
| Cs <sub>2</sub> DHQ–B <sup>1</sup>                     | 8.21  | 8.17  | 8.43  | 119.0             | 119.1            | 90.0              | 2.28                                                 |
| Cs <sub>2</sub> DHQ–C                                  | 4.13  | 12.21 | 8.16  | 90.0              | 89.8             | 89.7              | 0.0                                                  |

- 1) The crystallographic centered unit cells in Table 4 are transformed into primitive ones prior to calculations.
- 2) Relative energies are given in respect to the lowest energy structure of the given salt

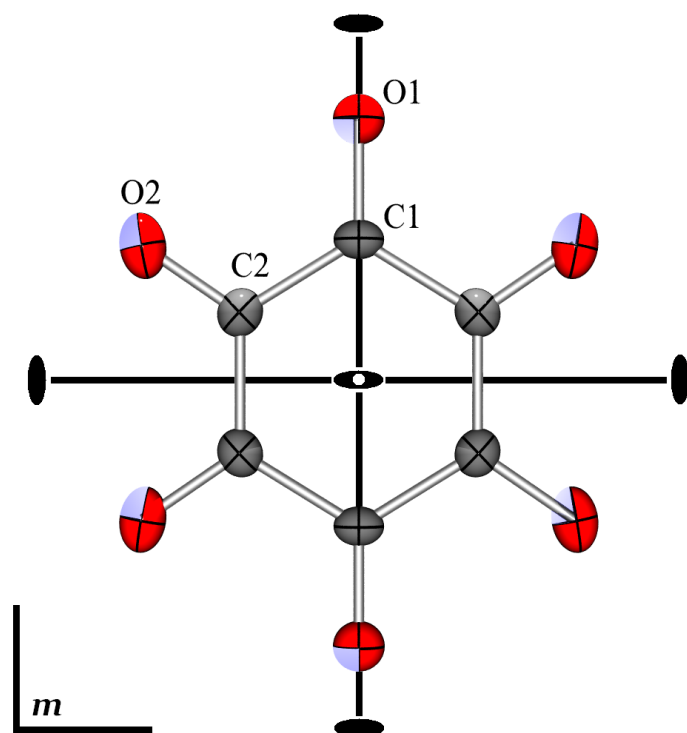

**Figure S1** ORTEP-3 drawing of a disordered  $\text{DHQ}^{2-}$  anion in  $\text{Cs}_2\text{DHQ}$  with symmetry elements shown. Due to a disorder, hydrogen atom could not be located; O2 atom and C-attached H are partly populated ( $pp = 0.25$ ). Displacement ellipsoids are drawn at the probability level of 50 % and hydrogen atoms are depicted as spheres of arbitrary radii.

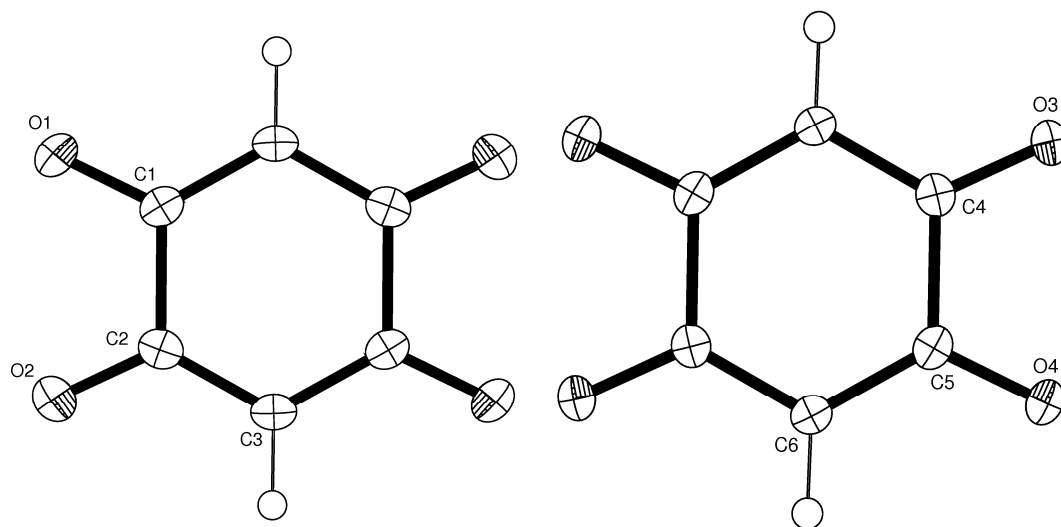

**Figure S2** ORTEP-3 drawing of two symmetry-independent  $\text{DHQ}^{2-}$  anions in  $\text{Li}_2\text{DHQ}\cdot 2\text{H}_2\text{O}$ . Displacement ellipsoids are drawn at the probability level of 50 % and hydrogen atoms are depicted as spheres of arbitrary radii.

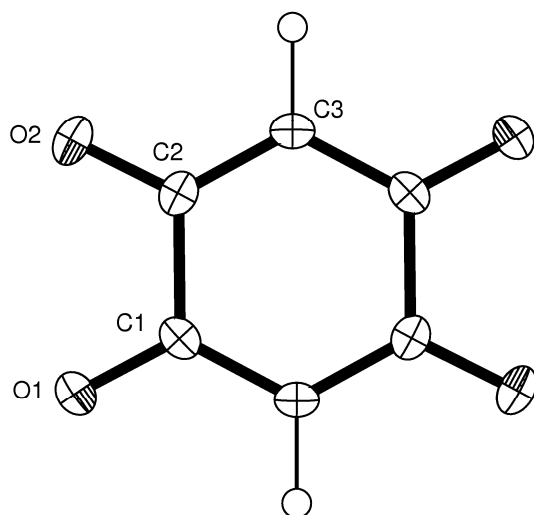

**Figure S3** ORTEP-3 drawing of  $\text{DHQ}^{2-}$  anion in  $\text{Rb}_2\text{DHQ}$ . Displacement ellipsoids are drawn at the probability level of 50 % and hydrogen atoms are depicted as spheres of arbitrary radii.

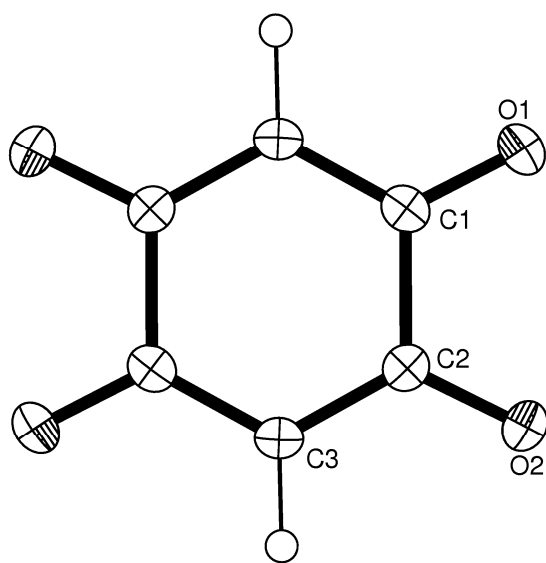

**Figure S4** ORTEP-3 drawing of  $\text{DHQ}^{2-}$  anion in  $(\text{NH}_4)_2\text{DHQ}$ . Displacement ellipsoids are drawn at the probability level of 50 % and hydrogen atoms are depicted as spheres of arbitrary radii.

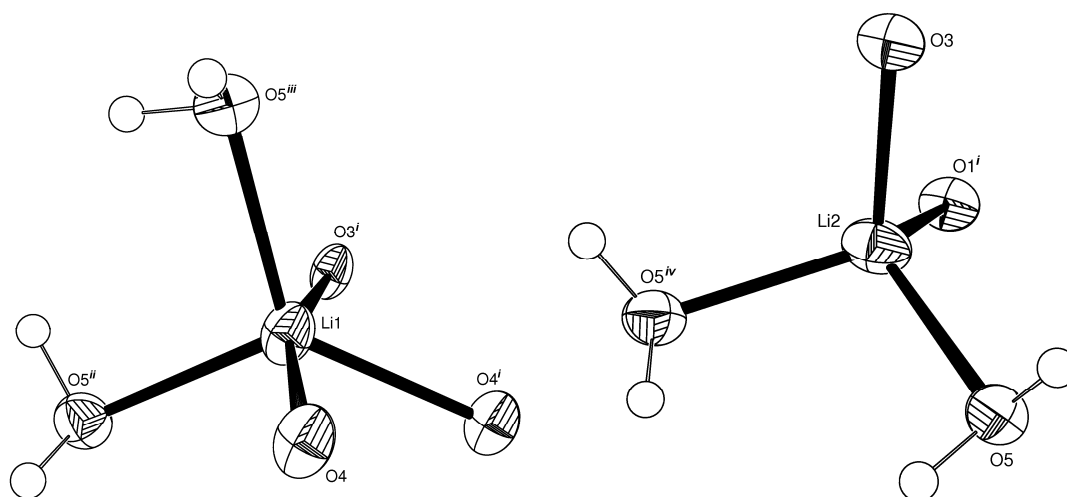

**Figure S5** ORTEP-3 drawing of different coordination spheres in two symmetry-independent lithium cations in  $\text{Li}_2\text{DHQ}\cdot 2\text{H}_2\text{O}$ . The penta-coordination of Li1 is between trigonal bipyramid and square-pyramid with  $\text{Li}\cdots\text{O}$  distances ranging from 1.995(4) to 2.110(2) Å. The tetrahedral environment about Li2 with  $\text{Li2}\cdots\text{O}$  distances form 1.908(4) to 2.027(2) Å. Displacement ellipsoids are drawn at the probability level of 50 % and hydrogen atoms are depicted as spheres of arbitrary radii. Symmetry operators: *i*)  $1 - x, y, 2 - z$ ; *ii*)  $-1/2 + x, -1/2 - y, z$ ; *iii*)  $-1/2 + x, 1/2 + y, z$ ; *iv*)  $x, -y, z$ .

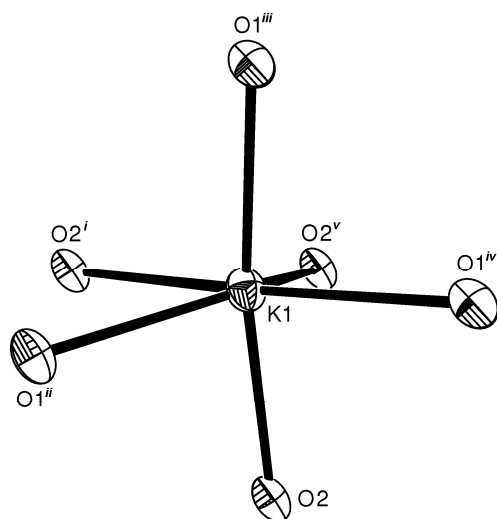

**Figure S6** ORTEP-3 drawing of the cation distorted octahedral environment in  $\text{K}_2\text{DHQ}$  with  $\text{K}\cdots\text{O1}^{ii} = 2.779(2)$ ,  $\text{K}\cdots\text{O1}^{iii} = 2.817(2)$ ,  $\text{K}\cdots\text{O1}^{iv} = 3.010(2)$ ,  $\text{K}\cdots\text{O2} = 2.700(1)$ ,  $\text{K}\cdots\text{O2}^i = 2.724(1)$ ,  $\text{K}\cdots\text{O2}^v = 2.745(1)$  Å. Displacement ellipsoids are drawn at the probability level of 50 % and hydrogen atoms are depicted as spheres of arbitrary radii. Symmetry operators: *i*)  $1 + x, y, z$ ; *ii*)  $-1 - x, -1/2 + y, 3/2 - z$ ; *iii*)  $-1 - x, 1 - y, 1 - z$ ; *iv*)  $-x, -1/2 + y, 3/2 - z$ ; *v*)  $-x, 1 - y, 2 - z$ .

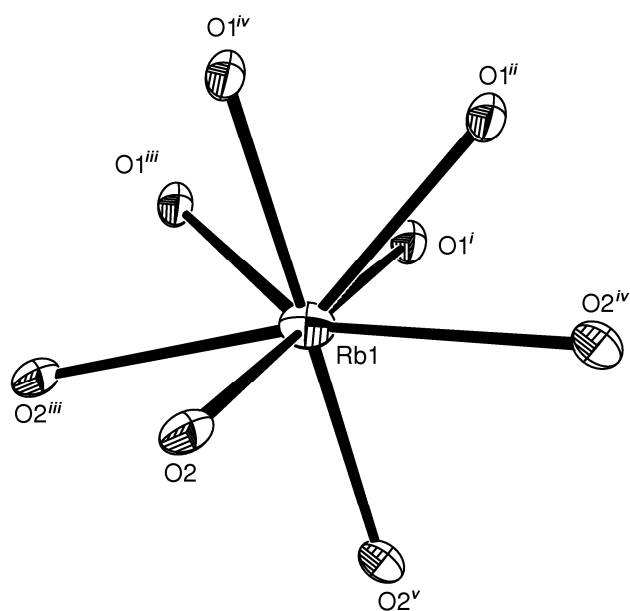

**Figure S7** ORTEP-3 drawing of cation octa-coordination sphere in  $\text{Rb}_2\text{DHQ}$ .  $\text{Rb}^+$  is located at the special position on the twofold rotation axes (8 g)  $0, y, \frac{1}{4}$  of  $Ibam$  space group.  $\text{Rb1}\cdots\text{O1}^i$  and  $\text{Rb}\cdots\text{O1}^{ii} = 2.974(3)$  Å,  $\text{Rb}\cdots\text{O1}^{iii}$  and  $\text{Rb}\cdots\text{O1}^{iv} = 2.983(3)$  Å;  $\text{Rb}\cdots\text{O2}$  and  $\text{Rb}\cdots\text{O2}^v = 3.011(3)$  Å;  $\text{Rb}\cdots\text{O2}^{iii}$  and  $\text{Rb}\cdots\text{O2}^{iv} = 3.286(3)$  Å. Displacement ellipsoids are drawn at the probability level of 50 % and hydrogen atoms are depicted as spheres of arbitrary radii. Symmetry operators: *i*)  $-1/2 + x, 1/2 + y, 1/2 + z$ ; *ii*)  $1/2 - x, 1/2 + y, -z$ ; *iii*)  $1/2 - x, 1/2 - y, 1/2 + z$ ; *iv*)  $-1/2 + x, 1/2 - y, -z$ ; *v*)  $-x, y, 1/2 - z$ .

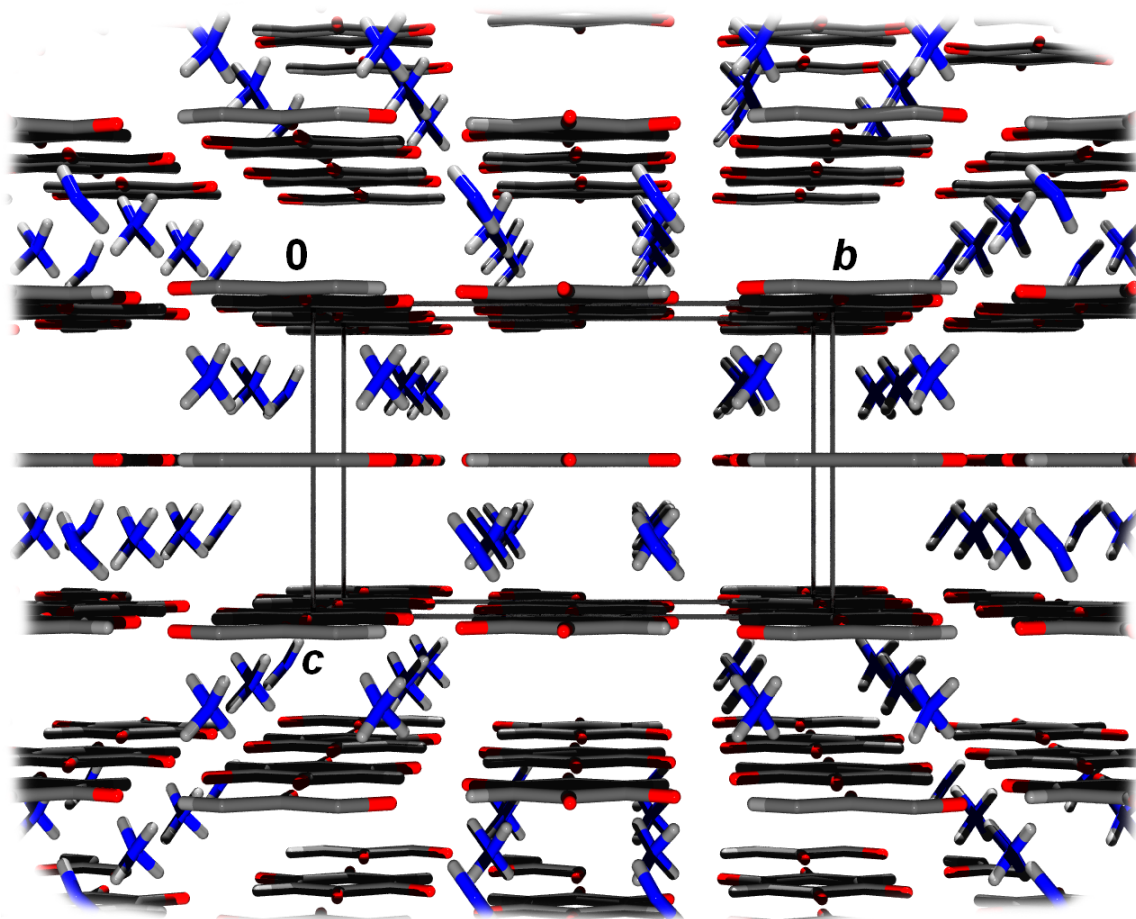

**Figure S8** Crystal packing of  $(\text{NH}_4)_2\text{DHQ}$  viewed in the direction  $[100]$ .  $\text{DHQ}^{2-}$  anions are located on a crystallographic mirror plane and are therefore parallel.

## Computational details

The basis sets used in the calculations are Gaussian sets designed for solid state calculations with the Crystal program (<http://www.crystal.unito.it/>). They were taken from the web page: <http://www.tcm.phy.cam.ac.uk/~mdt26/crystal.html>. The references to papers with the details on their use are included in the tables listed below. The format is appropriate for Gaussian 09.

**Title:** hydrogen atom

**Author:** M. D. Towler

**Ref.:** A. R. Porter, M. D. Towler, R. J. Needs, Muonium as a hydrogen analogue in silicon and germanium: Quantum effects and hyperfine parameters, Phys. Rev. B **60** (1999) 13534-13546

```
H 0
S 8 1.0
50362.3 0.00000020
29510.2 0.00000104
 4251.44 0.00001154
   827.084 0.00007679
   193.406 0.00043129
    50.0397 0.00219849
    13.7402 0.01055974
     3.9009 0.04760939
S 2 1.0
  1.1397 0.18487289
   0.346 0.47812170
S 1 1.0
  0.109 1.0
P 1 1.0
  0.1098 1.0
```

**Title:** carbon "6-21G\*"

**Author:** Pople et al. (modified by M. Catti)

**Refs.:** M. Catti, A. Pavese, R. Dovesi, V. R. Saunders, Static lattice and electron properties of MgCO<sub>3</sub> (magnesite) calculated by abinitio periodic Hartree-Fock methods, Phys. Rev. B **47** (1993) 9189-9198

Modified by M. D. Towler for carbon graphite

```
C 0
S 6 1.0
3047.52490 0.0018347
 457.369510 0.0140373
 103.948690 0.0688426
  29.2101550 0.2321844
   9.28666300 0.4679413
   3.16392700 0.3623120
SP 1 1.0
  8.4379430 1.0 1.0
SP 1 1.0
  1.88128850 1.0 1.0
SP 1 1.0
  0.58550980 1.0 1.0
```



```
SP 1 1.0
    0.1808    1.0    1.0
D 1 1.0
    0.8325    1.0
```

**Title: nitrogen "6-21G\*"**

**Author:** Pople et al.

**Ref.:** R. Dovesi, M. Causa, R. Orlando, C. Roetti, V. R. Saunders, Ab initio approach to molecular-crystals - a periodic Hartree-Fock study of crystalline urea, J. Chem. Phys. **92** (1990) 7402-7411

```
N 0
S 6 1.0
    4150.0    0.001845
    620.1    0.01416
    141.7    0.06863
    40.34    0.2286
    13.03    0.4662
    4.47    0.3657
SP 2 1.0
    5.425 -0.4133 0.238
    1.149 1.224 0.859
SP 1 1.0
    0.2832 1.0    1.0
D 1 1.0
    0.8    1.0
```

**Title: oxygen "6-21G\*"**

**Author:** J. S. Binkley, J. A. Pople, W. J. Hehre, Self-consistent molecular-orbital methods. 21. Small split-valence basis-sets for 1st-row elements, J. Am. Chem. Soc. **102** (1980) 939-947; M. S. Gordon, J. S. Binkley, J. A. Pople, Self-consistent molecular-orbital methods .22. Small split-valence basis-sets for 2nd-row elements, J. Am. Chem. Soc. **104** (1982) 2797-2803

**Ref.:** R. Dovesi, M. Causa, R. Orlando, C. Roetti, V. R. Saunders, Ab initio approach to molecular-crystals - a periodic Hartree-Fock study of crystalline urea, J. Chem. Phys. **92** (1990) 7402-7411

```
O 0
S 6 1.0
    5.472E+03 1.832E-03
    8.178E+02 1.410E-02
    1.864E+02 6.863E-02
    5.302E+01 2.294E-01
    1.718E+01 4.664E-01
    5.912E+00 3.642E-01
SP 2 1.0
    7.403E+00-4.045E-01 2.446E-01
    1.576E+00 1.222E+00 8.540E-01
SP 1 1.0
    3.737E-01 1.000E+00 1.000E+00
D 1 1.0
    8.000E-01 1.000E+00
```

**Title: sodium "8-511G"**

**Comment:** optimized in NaCl

**Refs.:** M. Prencipe, A. Zupan, R. Dovesi, E. Apra, V. R. Saunders, Ab-initio study of the structural-properties of LiF, NaF, KF, LiCl,

NaCl, and KCl, Phys. Rev. B **51** (1995) 3391-3396; E. Apra, M. Causa, M. Prencipe, R. Dovesi, V. R. Saunders, On the structural-properties of NaCl - An ab initio study of the B1-B2 phase-transition, J. Phys. Condens. Matter **5** (1993) 2969-2976

```
Na 0
S 8 1.0
  56700.0 0.000225
  8060.0 0.00191
  1704.0 0.01105
  443.6 0.05006
  133.1 0.1691
  45.8 0.3658
  17.75 0.3998
  7.38 0.1494
SP 5 1.0
  119.0 -0.00673 0.00803
  25.33 -0.0798 0.0639
  7.80 -0.0793 0.2074
  3.00 0.3056 0.3398
  1.289 0.5639 0.3726
SP 1 1.0
  0.578 1.0 1.0
SP 1 1.0
  0.323 1.0 1.0
```

**Title:** potassium

**Comments:** optimized in KCl (K +1), extra d-shell in K2O essential for accurate C44 elastic constant

**Refs.:** R. Dovesi, C. Roetti, C. Freyriaafava, M. Prencipe, V. R. Saunders, On the elastic properties of lithium, sodium and potassium oxide - An ab initio study, Chem. Phys. **156** (1991) 11-19

```
K 0
S 8 1.0
  172500.0 0.000220
  24320.0 0.00192
  5140.0 0.01109
  1343.9 0.04992
  404.5 0.1702
  139.4 0.3679
  54.39 0.4036
  22.71 0.1459
SP 6 1.0
  402.0 -0.00603 0.00841
  93.5 -0.0805 0.0602
  30.75 -0.1094 0.2117
  11.92 0.258 0.3726
  5.167 0.684 0.4022
  1.582 0.399 0.186
SP 5 1.0
  17.35 -0.0074 -0.0321
  7.55 -0.129 -0.062
  2.939 -0.6834 0.1691
  1.19 1.08 1.500
  0.674 1.03 1.060
SP 1 1.0
  0.389 1.0 1.0
SP 1 1.0
  0.216 1.0 1.0
```

D 3 1.0  
3.94 0.160  
1.072 0.313  
0.394 0.406

**Title:** Rb+ all electron basis  
**Author:** C. Zicovich Wilson  
**When:** 1995  
**Refs:** unpublished

Rb 0

S 9 1.0  
2953550.000000 0.000034  
420969.000000 0.000298  
81358.700000 0.002060  
18877.300000 0.011200  
5164.480000 0.047800  
1622.390000 0.157300  
573.192000 0.352400  
221.489000 0.423500  
89.080900 0.151900

SP 7 1.0  
6647.380000 -0.000333 0.000875  
1508.870000 -0.006260 0.008570  
435.794000 -0.059000 0.055900  
146.168000 -0.146600 0.220000  
56.172200 0.242500 0.447900  
23.626100 0.708000 0.395500  
9.797900 0.222700 0.089900

SP 6 1.0  
180.092000 0.001090 -0.010500  
53.295200 -0.030400 -0.074900  
19.313200 -0.350600 0.076900  
7.943500 0.289600 1.003900  
3.171400 1.054700 1.227300  
1.070600 0.151700 0.196700

D 5 1.0  
288.005000 0.004180  
83.137700 0.036080  
29.003600 0.163320  
10.918500 0.393700  
4.116200 0.473820

D 1 1.0  
1.472200 1.0

SP 3 1.0  
3.381600 -0.664900 -0.194000  
1.421100 -0.580600 0.592600  
0.566900 2.913700 2.705300

SP 1 1.0  
0.208300 1.0 1.0

**Title:** caesium  
**Author:** M.D. Towler  
**When:** May 1996

Cs 0

S 9 1.0  
5091567.0 0.0000487  
738658.0 0.000401

|           |           |          |  |
|-----------|-----------|----------|--|
| 160308.0  | 0.002290  |          |  |
| 41490.2   | 0.011130  |          |  |
| 12040.1   | 0.046000  |          |  |
| 3845.22   | 0.153500  |          |  |
| 1368.4    | 0.348     |          |  |
| 545.478   | 0.4323    |          |  |
| 229.8491  | 0.2042    |          |  |
| SP 7 1.0  |           |          |  |
| 14926.078 | -0.000349 | 0.001090 |  |
| 3459.0    | -0.00632  | 0.00995  |  |
| 1071.0    | -0.0518   | 0.057600 |  |
| 386.043   | -0.1462   | 0.2171   |  |
| 158.325   | 0.0889    | 0.457600 |  |
| 73.9081   | 0.617     | 0.4702   |  |
| 36.2394   | 0.5006    | 0.2275   |  |
| SP 6 1.0  |           |          |  |
| 363.971   | 0.00632   | -0.0129  |  |
| 137.485   | -0.0238   | -0.0733  |  |
| 56.6146   | -0.3172   | 0.00223  |  |
| 25.8734   | -0.0706   | 0.8454   |  |
| 12.3291   | 0.9066    | 1.3707   |  |
| 5.978     | 0.4774    | 0.4984   |  |
| D 6 1.0   |           |          |  |
| 426.715   | 0.0145    |          |  |
| 127.457   | 0.1005    |          |  |
| 47.9214   | 0.3177    |          |  |
| 20.0956   | 0.4689    |          |  |
| 9.1352    | 0.2873    |          |  |
| 4.0878    | 0.0496    |          |  |
| SP 3 1.0  |           |          |  |
| 9.7098    | 0.488     | -0.109   |  |
| 5.69      | 0.1631    | 0.2356   |  |
| 2.7177    | 0.0711    | -0.0248  |  |
| D 3 1.0   |           |          |  |
| 7.9974    | 0.2128    |          |  |
| 3.2744    | 0.5687    |          |  |
| 1.3821    | 0.4271    |          |  |
| D 1 1.0   |           |          |  |
| 0.5496    | 1.0       |          |  |
| SP 3 1.0  |           |          |  |
| 4.8272    | 0.1174    | 0.3367   |  |
| 2.4442    | 1.0941    | 1.3927   |  |
| 1.1623    | 0.6078    | 0.5449   |  |
| SP 1 1.0  |           |          |  |
| 0.4725    | 1.0       | 1.0      |  |
| SP 1 1.0  |           |          |  |
| 0.1789    | 1.0       | 1.0      |  |
